# Supplementary material
Source: HighWire-hosted journal article supplement (https://erj.ersjournals.com/content/56/2/2002429)
Supplement: inline-supplementary-material-1 [file inline-supplementary-material-1.pdf]

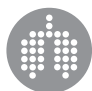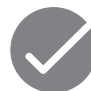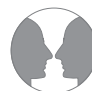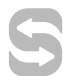

SHAREABLE PDF

# Building the house of CARDS by phenotyping on the fly

Rajkumar Rajendram <sup>1,2</sup>

**Affiliations:** <sup>1</sup>Dept of Medicine, King Abdulaziz Medical City, King Abdulaziz International Medical Research Center, Ministry of National Guard – Health Affairs, Riyadh, Saudi Arabia. <sup>2</sup>College of Medicine, King Saud bin Abdulaziz University of Health Sciences, Riyadh, Saudi Arabia.

**Correspondence:** Rajkumar Rajendram, Dept of Medicine, King Abdulaziz Medical City, Ministry of National Guard – Health Affairs, Riyadh, Saudi Arabia. E-mail: rajkumarrajendram@doctors.org.uk

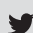

@ERSpublications

**Using clinical, pathophysiological and immunological phenotyping of ARDS to refine management of COVID-19 is urgently required to improve outcomes from refractory hypoxia** <https://bit.ly/2VvZe1p>

**Cite this article as:** Rajendram R. Building the house of CARDS by phenotyping on the fly. *Eur Respir J* 2020; 56: 2002429 [<https://doi.org/10.1183/13993003.02429-2020>].

This single-page version can be shared freely online.

## *To the Editor:*

Some patients with coronavirus disease 2019 (COVID-19), fulfilling the Berlin criteria for acute respiratory distress syndrome (ARDS), do not respond well to the current treatment paradigm [1]. The perspective by RELLO *et al.* [2] on phenotypes of COVID-19, and the editorial by Bos *et al.* [3], are therefore of great interest. The “responsible” phenotyping of COVID-19 ARDS (CARDS) recommended by Bos *et al.* [3] may be expedited by re-evaluating the existing literature on refractory hypoxia.
